# Supplementary material for: Phosphorus doped hierarchical porous carbon: an efficient oxygen reduction electrocatalyst for on-site H2O2 production
Source: Royal Society of Chemistry journal article supplement (doi:10.1039/d3qi00668a), 2023-01-01
Supplement: d3qi00668a1.pdf [file d3qi00668a1.pdf]

## Electronic Supplementary Information

### Phosphorus doped hierarchical porous carbon: an efficient oxygen reduction electrocatalyst for *on-site* H<sub>2</sub>O<sub>2</sub> production

Lizhi Liu<sup>a</sup>, Chenglu Yan<sup>b</sup>, Xuanyan Luo<sup>c</sup>, Caixia Li<sup>a</sup>, Di Zhang<sup>a</sup>, Huaqiao Peng<sup>b</sup>, Huiyong Wang<sup>d</sup>,  
Baozhan Zheng<sup>\*a</sup> and Yong Guo<sup>\*a</sup>

<sup>a</sup> College of Chemistry, Sichuan University, Chengdu 610064, China.

<sup>b</sup> Key Laboratory of Aviation Fuel & Chemical Airworthiness and Green Development, The Second Research Institute of Civil Aviation Administration of China, Chengdu 610041, China.

<sup>c</sup> West China School of Stomatology, Sichuan University, Chengdu 610064, China.

<sup>d</sup> School of Chemistry and Chemical Engineering, Henan Normal University, Xinxiang 453007, China. Sichuan University

\* Corresponding authors: E-mail: zhengbaozhan@scu.edu.cn (B. Z.); guoy@scu.edu.cn (Y. G.)

## **Experimental section**

**The treatment of Nafion 117 membrane:** Firstly, the Nafion 117 membrane was treated in 5% hydrogen peroxide at 80 °C for 1 h, and then soaked in deionized water for 0.5 h. Then it was boiled in 5% dilute sulfuric acid (mass ratio) at 80 °C for 1 hour. Finally, it was soaked in deionized water for half an hour.

**Preparation of catalyst ink:** The catalyst ink is firstly prepared by dispersing 5 mg catalyst material in the mixture of ethanol (490  $\mu$ L), deionized water (490  $\mu$ L), and Nafion (20  $\mu$ L). The solution is then sonicated for 30 min to get a uniform suspension. After that, 10  $\mu$ L catalyst ink is coated on the carbon paper uniformly, and the electrode with 0.05 mg  $\text{cm}^{-2}$  electrocatalyst loading can be obtained after drying.

**Disinfection experimental:** Standard E. coli strains were stored at -20°C in 15% (vol/vol) glycerol. All culturing was carried out in lysogeny broth (LB) at 37°C with shaking at 200 revolutions/min for 16 h. After a certain time of electrolysis, the electrolyte was taken out at a predetermined timed interval, and adjusted the pH value to neutral for disinfection. Then 4.5 mL of the electrolyte was mixed with 0.5 mL of the bacterial solution. After incubating for 30 min at room temperature, the mixture was diluted 100,000-fold in gradient immediately. Finally, 100  $\mu$ L of diluted liquid was spread on an agar plate, and the number of colonies was counted after 24 h of inverted culture in a constant temperature incubator at 37 °C.

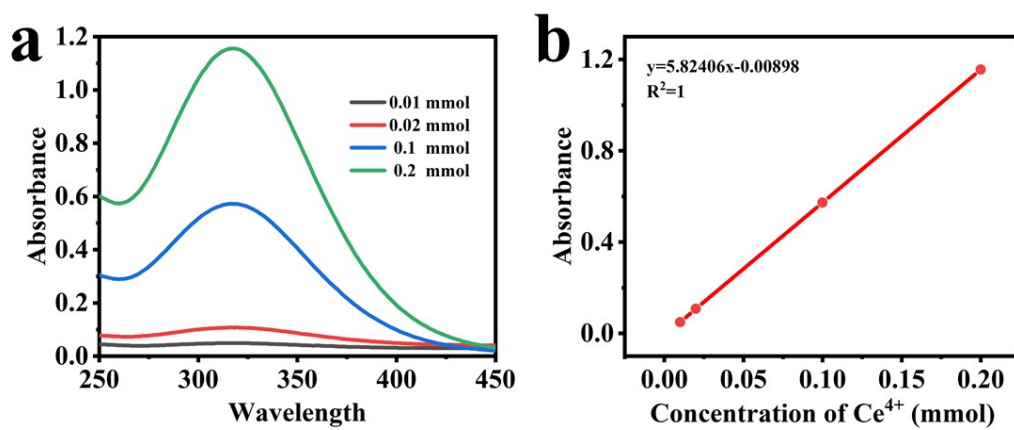

**Fig. S1** (a) UV-vis spectra of  $\text{Ce}^{4+}$  solution with various concentrations and (b) corresponding standard curve.

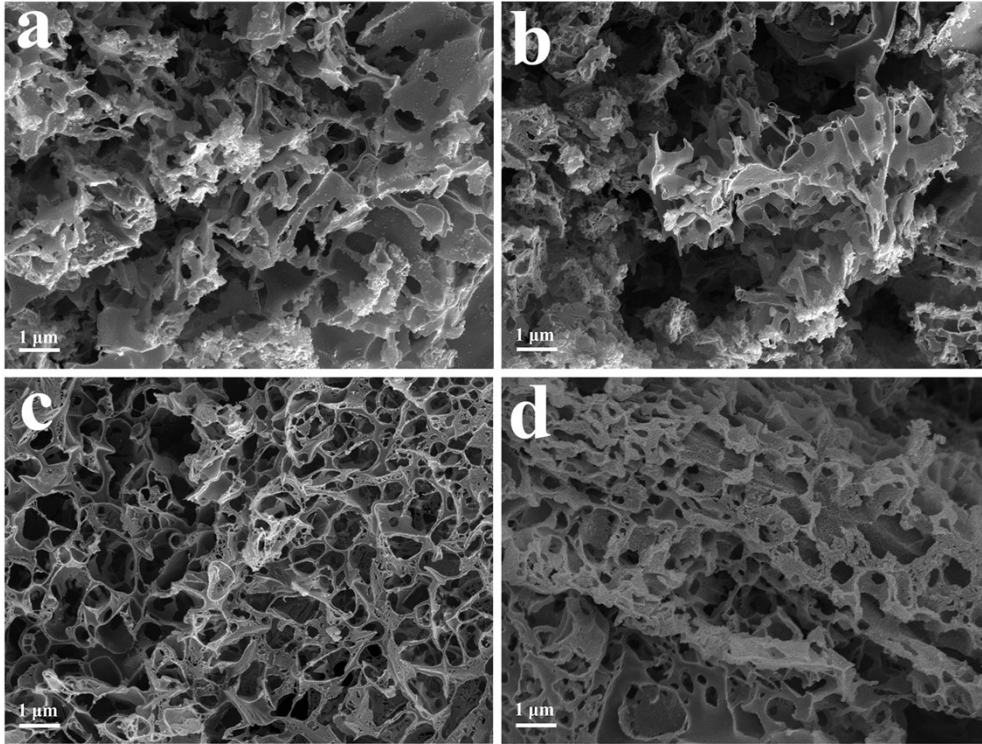

**Fig. S2** (a-d) SEM images of P<sub>x</sub>-MC: (a) P<sub>20</sub>-MC; (b) P<sub>40</sub>-MC; (c) P<sub>60</sub>-MC; (d) P<sub>80</sub>-MC.

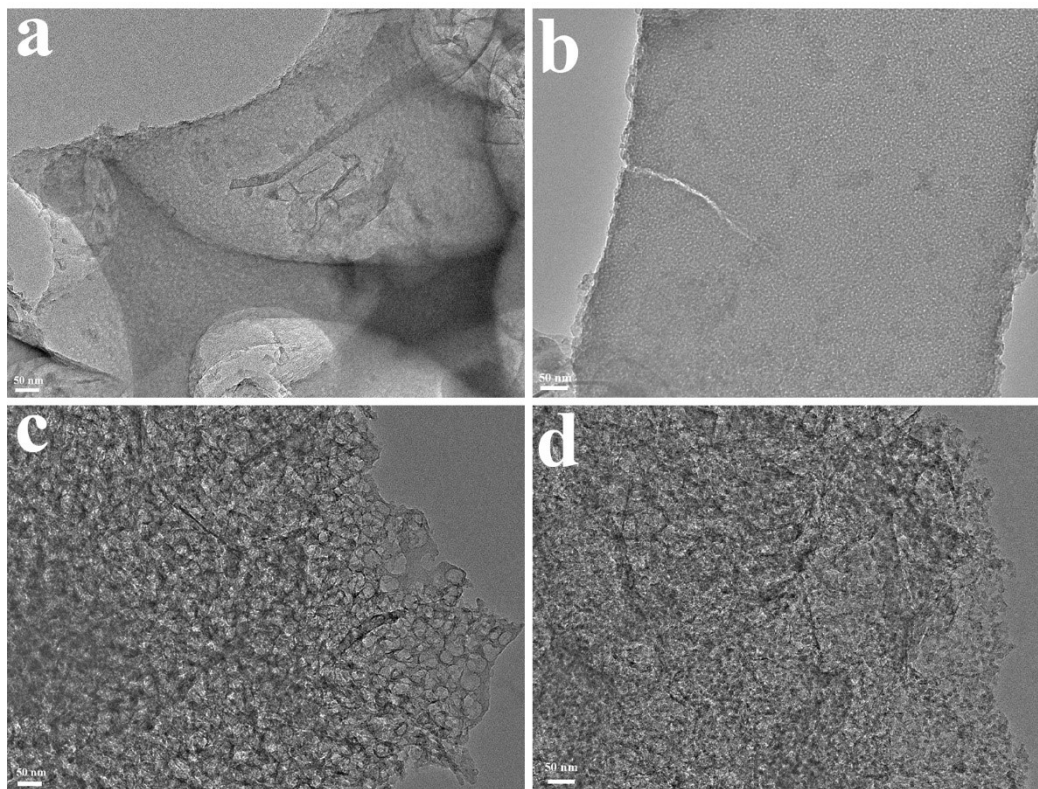

**Fig. S3** (a-d) HRTEM images of P<sub>x</sub>-MC: (a) P<sub>20</sub>-MC; (b) P<sub>40</sub>-MC; (c) P<sub>60</sub>-MC; (d) P<sub>80</sub>-MC.

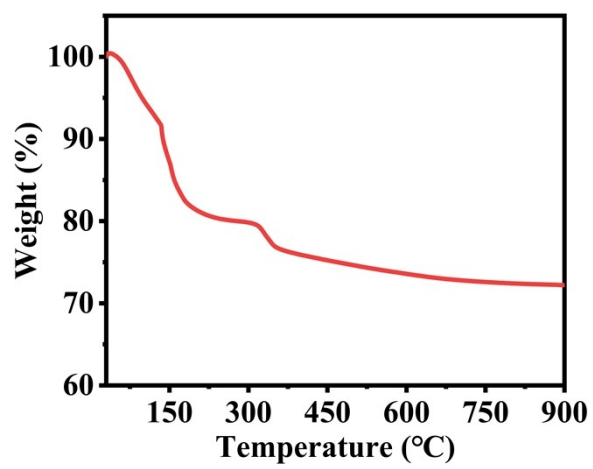

**Fig. S4** The thermogravimetric analysis (TGA) of SP.

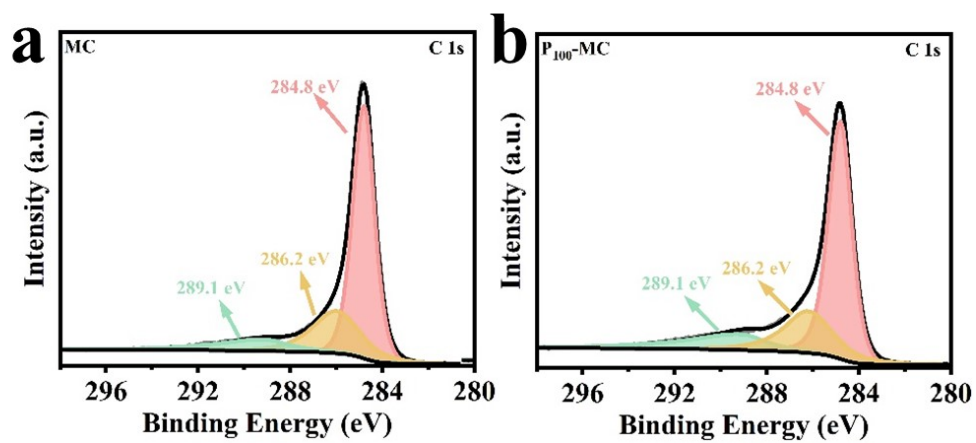

**Fig. S5** (a-b) High-resolution XPS spectra of C 1s: (a) MC; (b) P<sub>100</sub>-MC.

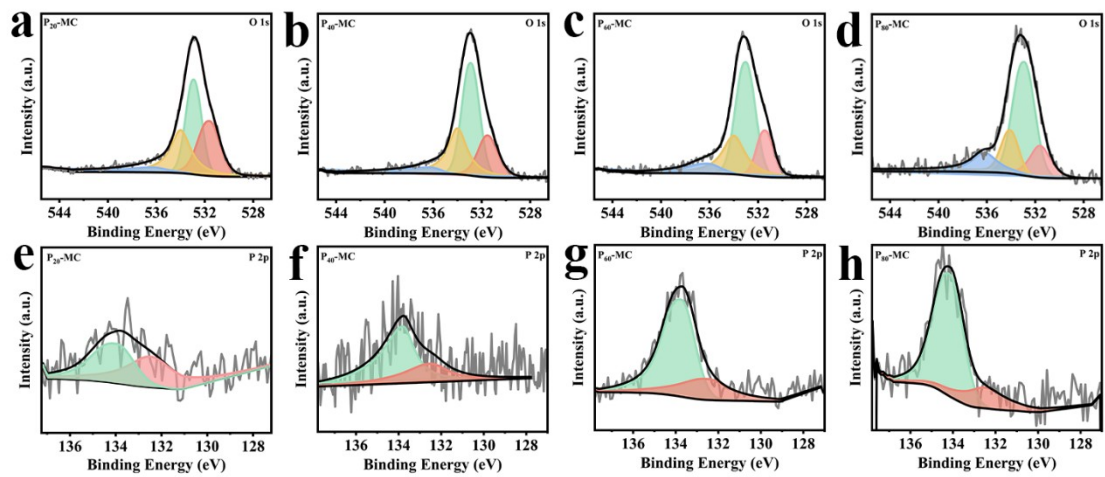

**Fig. S6** The O 1 s (a~d) and P 2p (e~h) XPS spectra of  $P_x$ -MC.



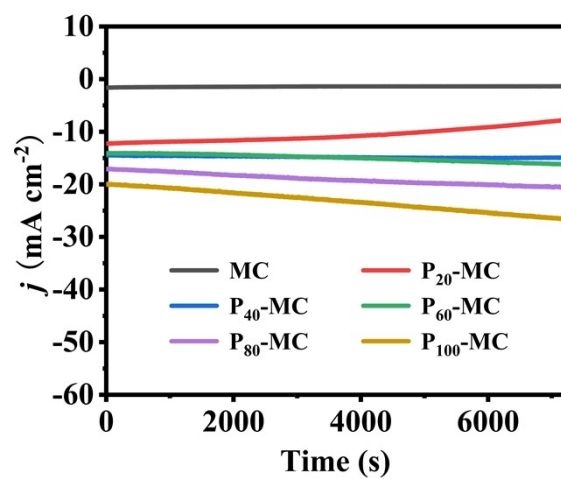

**Fig. S7** Time-dependent current density curves over MC and P<sub>x</sub>-MC at 0.3 V for 7200 s in 0.1 M KOH.

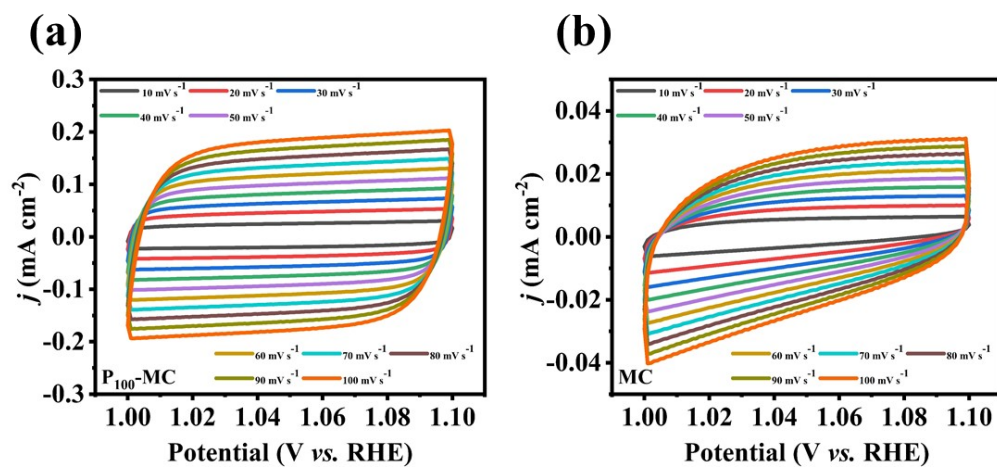

**Fig. S8** CV curves of  $\text{P}_{100}\text{-M}$  and MC in 0.1 M KOH at various scanning rates.

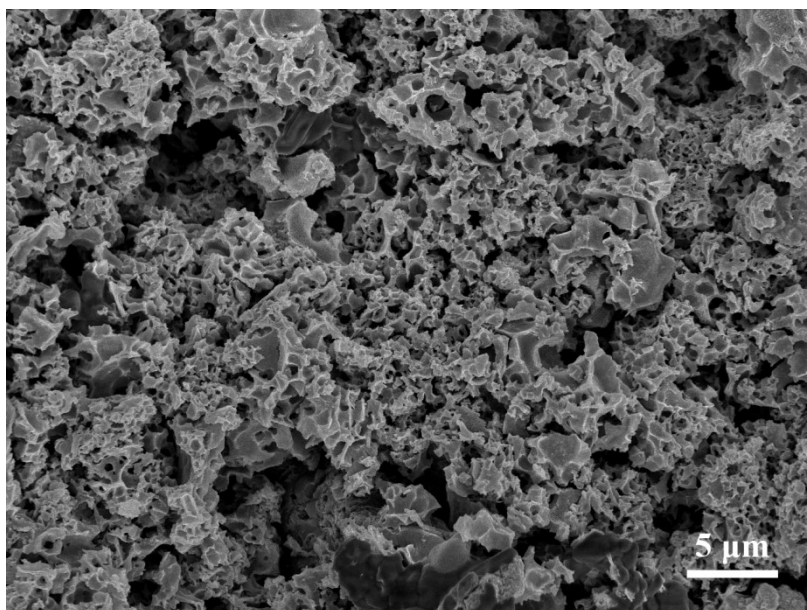

**Fig. S9** The SEM image of P<sub>100</sub>-MC after stability test.

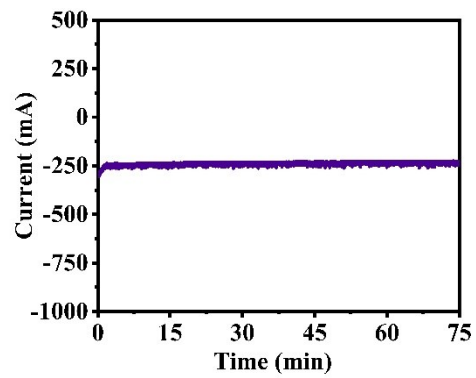

**Fig. S10** Time-dependent current density curves over P<sub>100</sub>-MC at 0.1 V vs. RHE for 75 min in 1 M KOH.

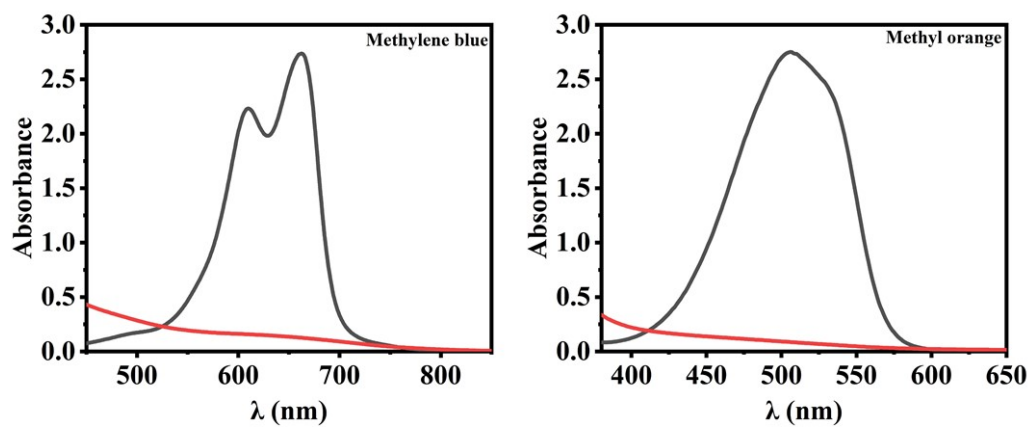

**Fig. S11** The UV-vis spectra of MB (left) and MO (right).

**Table S1** Comparison of P<sub>100</sub>-MC with reported catalysts for H<sub>2</sub>O<sub>2</sub> production.

| <b>Material</b>      | <b>Electrolyte</b> | <b>Productivity (mol h<sup>-1</sup> g<sub>cat.</sub><sup>-1</sup>)</b> | <b>FE(%)</b>        | <b>Ref.</b> |
|----------------------|--------------------|------------------------------------------------------------------------|---------------------|-------------|
| HNCS                 | 0.1 M KOH          | 0.62 @0.4 V vs. RHE                                                    | 80% @0.4 V vs.RHE   | [1]         |
| G-COF-950            | 0.1 M KOH          | 1.29 @0.1 V vs. RHE                                                    | 70% @0.1 V vs.RHE   | [2]         |
| O-P/N-900            | 0.1 M KOH          | 0.70 @0.1 V vs. RHE                                                    | 87% @0.1 V vs.RHE   | [3]         |
| PANI/CDs-Co-2        | 0.1 M KOH          | 3.50 @0 V vs. RHE                                                      | 87% @0 V vs.RHE     | [4]         |
| Ni-NPs/BCCF-20.7     | 0.1 M KOH          | 0.17 @0.2 V vs. RHE                                                    | 90% @0.2 V vs. RHE  | [5]         |
| DGLC                 | 0.1 M KOH          | 0.36 @0.1 V vs. RHE                                                    | 100% @0.1 V vs. RHE | [6]         |
| NHCSs                | 0.1 M KOH          | 7.32 @0.5 V vs. RHE                                                    | 97 % @0.5 V vs. RHE | [7]         |
| P-Ni/MC              | 0.1 M KOH          | 4.40 @0.15 V vs. RHE                                                   | 98% @0.15 V vs. RHE | [8]         |
| W <sub>1</sub> /NO-C | 0.1 M KOH          | 1.20 @0.2 V vs. RHE                                                    | 95%@0.2 V vs. RHE   | [9]         |
| Br-Ni MOF            | 0.1 M KOH          | 0.60 @0.4 V vs. RHE                                                    | 86%@0.4 V vs. RHE   | [10]        |
| NOC-6M               | 0.1 M KOH          | 0.55 @0.55 V vs. RHE                                                   | 93% @0.55 V vs. RHE | [11]        |
| P <sub>100</sub> -MC | 0.1 M KOH          | 8.41 @0.3 V vs. RHE                                                    | ~99% @0.3 V vs. RHE | This work   |

## References

- 1 Y. Hu, J. Zhang, T. Shen, Z. Li, K. Chen, Y. Lu, J. Zhang and D. Wang. Efficient electrochemical production of H<sub>2</sub>O<sub>2</sub> on hollow N-doped carbon nanospheres with abundant micropores, *ACS Appl. Mater. Interfaces*, 2021, **13**, 29551-29557.
- 2 J. Zhang, G. Zhang, S. Jin, Y. Zhou, Q. Ji, H. Lan, H. Liu and J. Qu, Graphitic N in nitrogen-Doped carbon promotes hydrogen peroxide synthesis from electrocatalytic oxygen reduction, *Carbon*, 2020, **163**, 154-161.
- 3 Z. Li, A. Kumar, N. Liu, M. Cheng, C. Zhao, X. Meng, H. Li, Y. Zhang, Z. Liu, G. Zhang and X. Sun, Oxygenated P/N co-doped carbon for efficient 2e<sup>-</sup> oxygen reduction to H<sub>2</sub>O<sub>2</sub>, *J. Mater. Chem. A*, 2022, **10**, 14355-1436.
- 4 Y. Zhou, X. Gu, J. Wu, H. Huang, M. Shao, Y. Liu and Z. Kang, Efficient synthesis of H<sub>2</sub>O<sub>2</sub> via oxygen reduction over PANI driven by kinetics regulation of carbon dots, *Appl. Catal. B Environ.* 2023, **322**, 122105.
- 5 H. Xu, M. Jin, J. Geng, S. Zhang and H. Zhang, Bacterial cellulose-regulated synthesis of metallic Ni catalysts for high-efficiency electrosynthesis of hydrogen peroxide, *Sci. China Mater.* 2022, **65**, 721-731.
- 6 C. Zhang, J. Zhang, J. Zhang, M. Song, X. Huang, W. Liu, M. Xiong, Y. Chen, S. Xia, H. Yang and D. Wang, Tuning coal into graphene-like nanocarbon for electrochemical H<sub>2</sub>O<sub>2</sub> production with nearly 100% Faraday efficiency, *ACS Sustain. Chem. Eng.* 2021, **9**, 9369-9375.
- 7 Z. Xu, Z. Ma, K. Dong, J. Liang, L. Zhang, Y. Luo, Q. Liu, J. You, Z. Feng, D. Ma, Y. Wang and X. Sun, Electrocatalytic two-electron oxygen reduction over nitrogen doped hollow carbon nanospheres, *Chem. Commun.* 2022, **58**, 5025-5098.
- 8 C. Yan, Q. Ma, F. Wang, L. Zhou, X. Lv, J. Du, B. Zheng and Y. Guo, Honeycomb-like phosphorus doped nickel/carbon: A highly efficient electrocatalyst for oxygen reduction to H<sub>2</sub>O<sub>2</sub>, *Chem. Eng. J.* 2022, **433**, 133651.
- 9 F. Zhang, Y. Zhu, C. Tang, Y. Chen, B. Qian, Z. Hu, Y. C. Chang, C. W. Pao, Q. Lin, S. A. Kazemi, Y. Wang, Lian Zhang, X. Zhang and H. Wang. High-

Efficiency Electrosynthesis of Hydrogen Peroxide from Oxygen Reduction Enabled by a Tungsten Single Atom Catalyst with Unique Tridentate  $N_1O_2$  Coordination. *Adv. Funct. Mater.* 2022, **32**, 2110224.

- 10 M. Liu, Y. Li, Z. Qi, H. Su, W. Cheng, W. Zhou, H. Zhang, X. Sun, X. Zhang, Y. Xu, Y. Jiang, Q. Liu and S. Wei, Self-Nanocavity-Confined Halogen Anions Boosting the High Selectivity of the Two-Electron Oxygen Reduction Pathway over Ni-Based MOFs. *J. Phys. Chem. Lett.* 2021, **12**, 8706–8712.
- 11 C. Zhang, G. Liu, B. Ning, S. Qian, D. Zheng and L. Wang, Highly efficient electrochemical generation of  $H_2O_2$  on N/O co-modified defective carbon. *Int. J. Hydrogen Energy.* 2021, **46**, 14277-14287.
